# Supplementary material for: FAM83A is a potential biomarker for breast cancer initiation
Source: PubMed Central journal article supplement (PMC8858535; doi:10.1186/s40364-022-00353-9), 2022-02-19
Supplement: 40364_2022_353_MOESM2_ESM.pdf [file 40364_2022_353_MOESM2_ESM.pdf]

**A**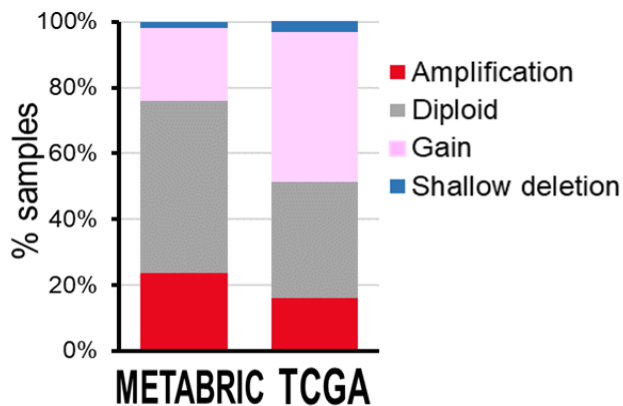**B**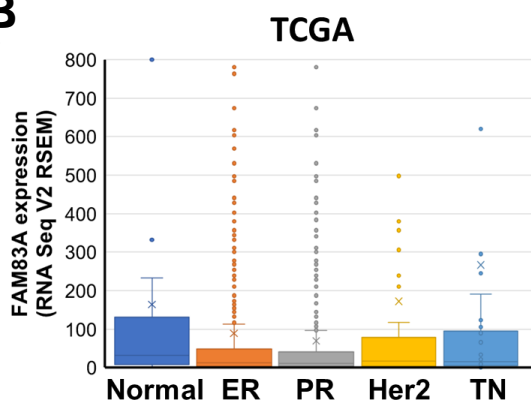**C**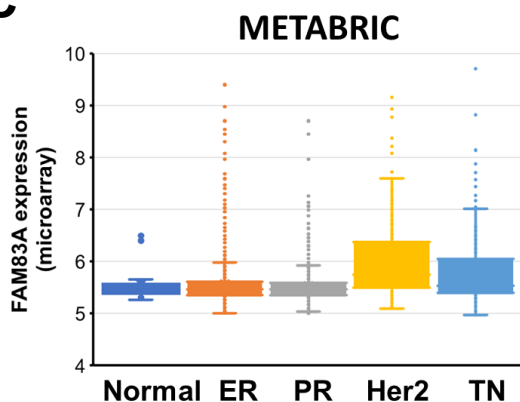**D**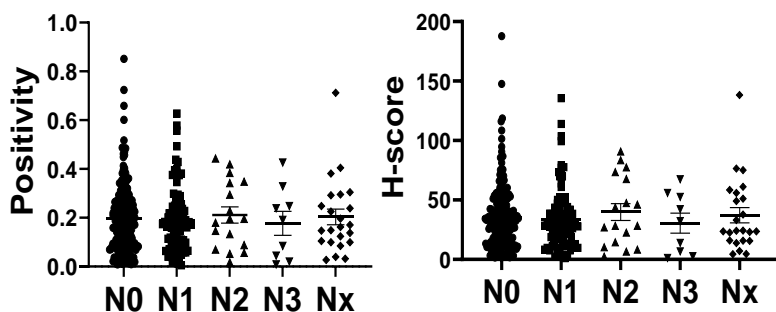**E**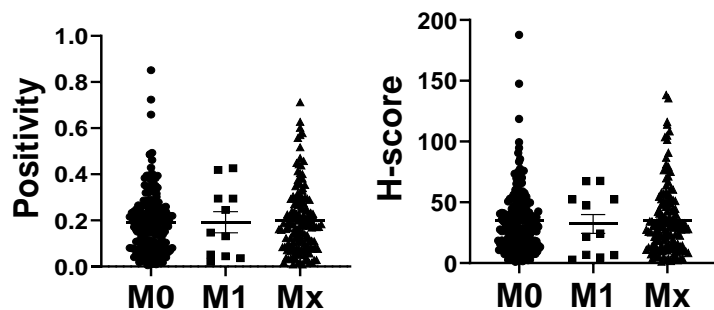

**Supplementary Figure 1: FAM83A expression in breast cancer data base.** **A)** FAM83A genomic aberrations in breast cancer from either METABRIC (N=1904) or TCGA (N=3255) dataset. Data of FAM83A mRNA expression in normal and breast cancer subtypes (based on hormone receptor expression) are retrieved from either the **(B)** TCGA or **(C)** METABRIC dataset using cBioportal database. FAM83A expression in breast cancer cases divided by either **(D)** lymph nodes positivity (N) or **(E)** metastatic disease (M) staging. Data from both positivity (left panel) and H-score (right panel) are shown. Each dot represent a data point. Data are shown as mean  $\pm$  standard error of the mean.

**A**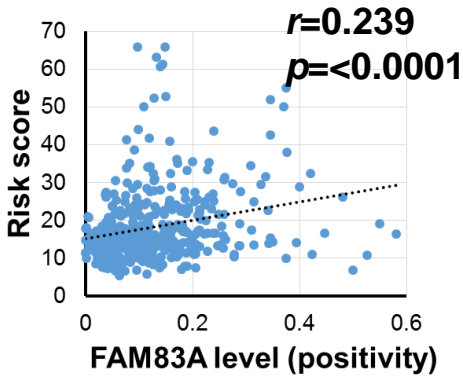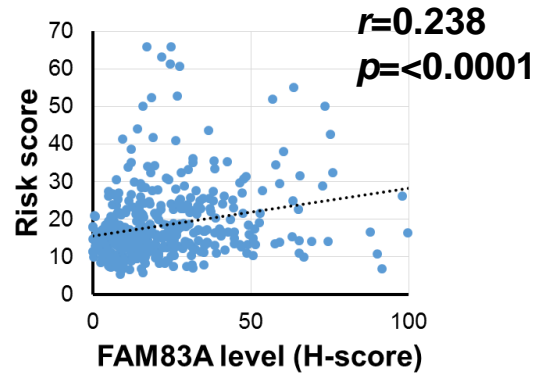**B**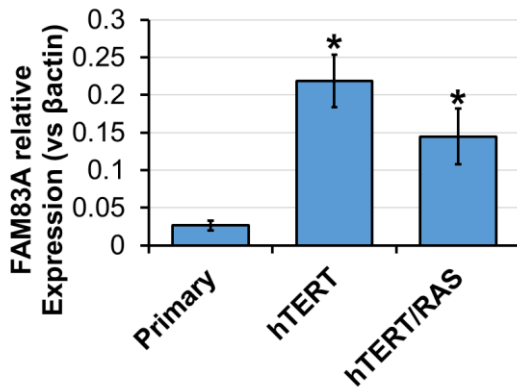

**Supplementary Figure 2: Correlation of FAM83A expression with breast cancer risk and progress.** **A)** Pearson's correlation analysis revealed a direct link between FAM83A expression in normal breasts (N=408) and the Tyrer-Cuzick breast cancer risk score. Data are shown as positivity analysis (left panel) and H-score analysis (right panel). **B)** FAM83A expression in either primary, hTERT-immortalized, or hTERT/RAS-transformed breast epithelial cells evaluated by using qPCR. \*:  $p<0.05$

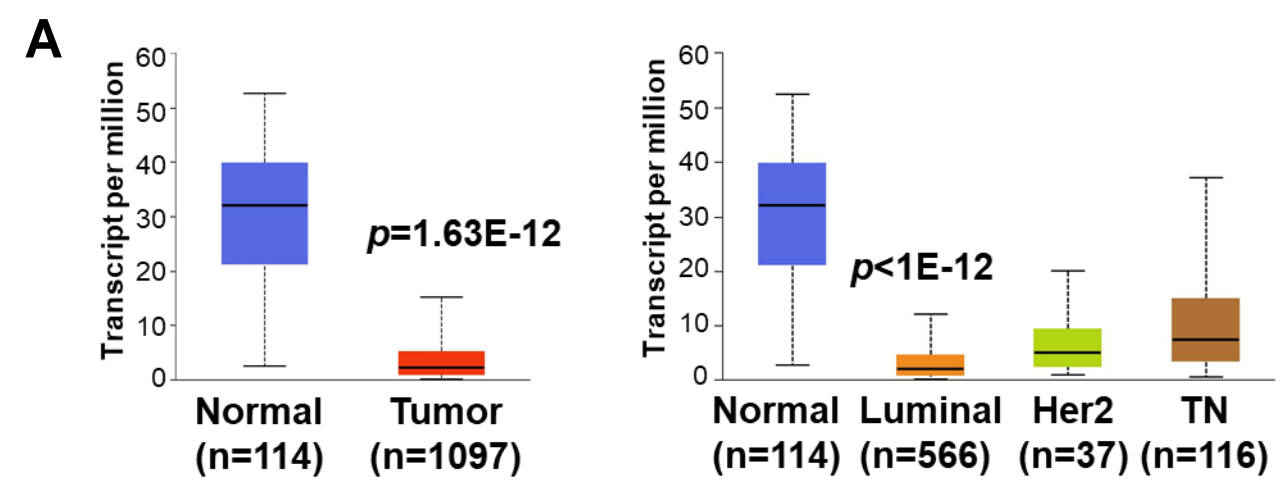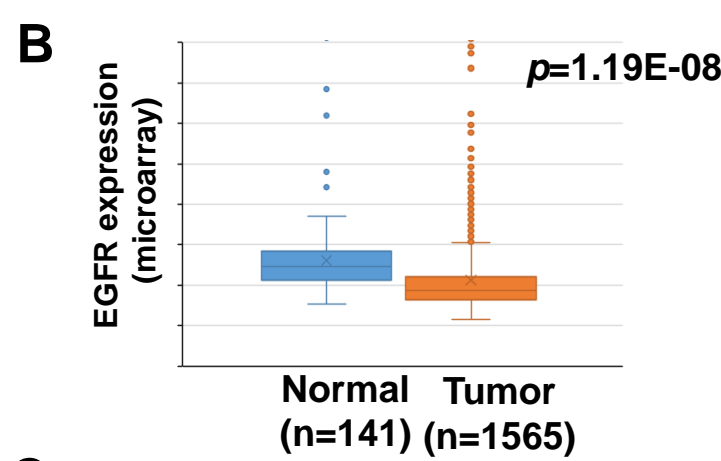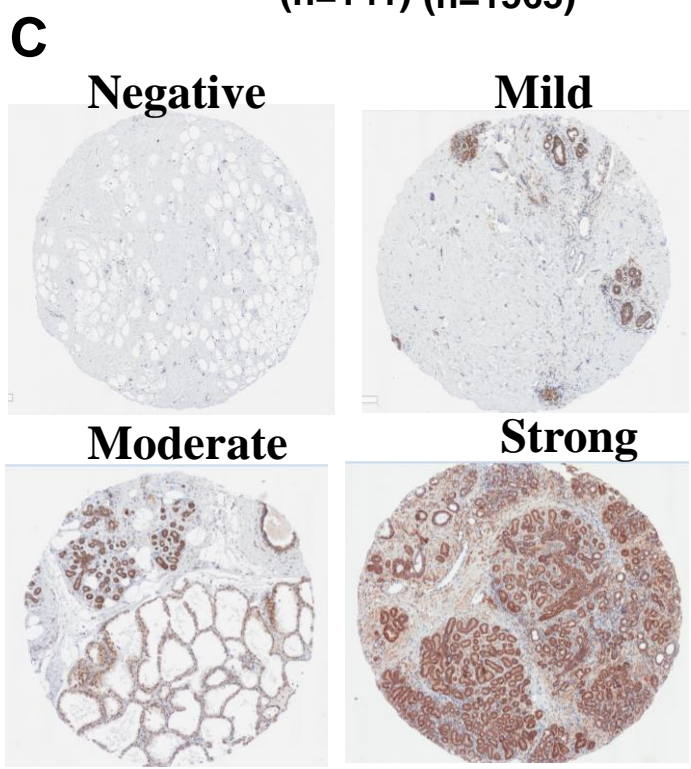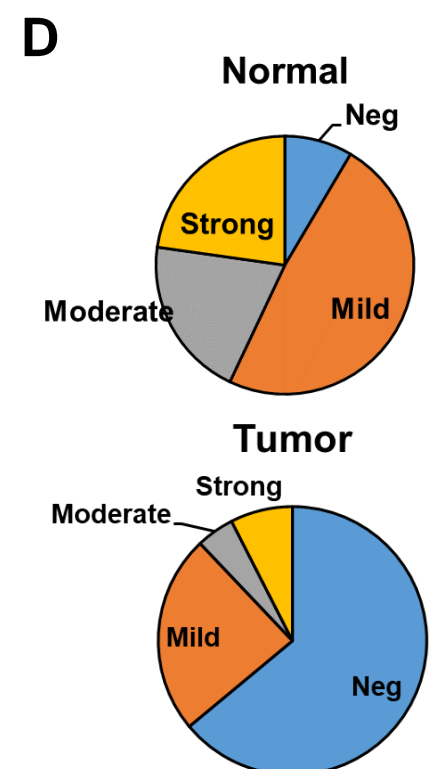

**Supplementary Figure 3: EGFR expression in tumor and normal breast.** EGFR expression was surveyed in the (A) TCGA and (B) METABRIC datasets. (C) Representative images at 5.6 magnification of different EGFR staining intensities in the tumor TMA: Strong, Moderate, Mild and Negative. (D) Pie chart showing the proportion of each staining intensity in either the normal breast TMA or the breast tumor TMA.

**A**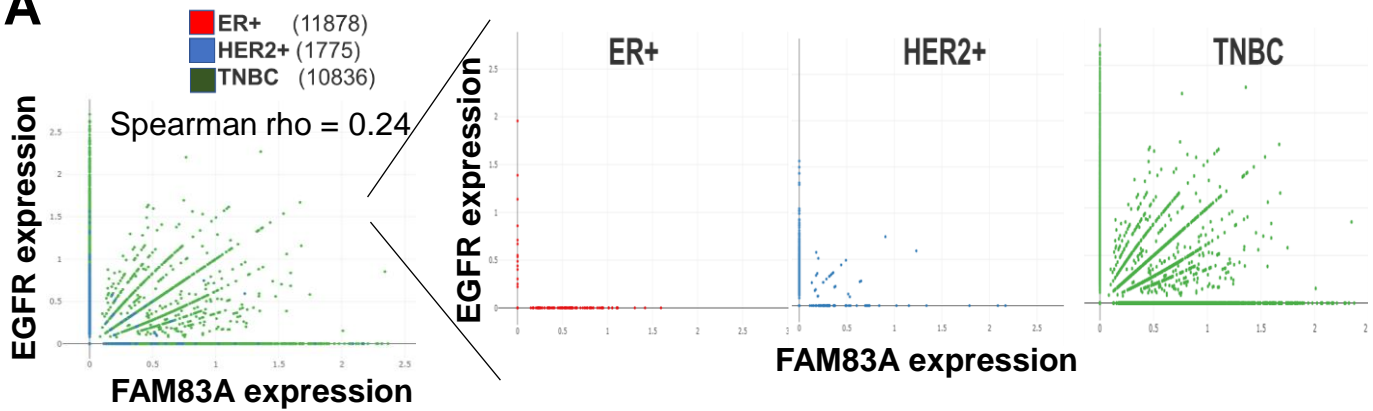**B**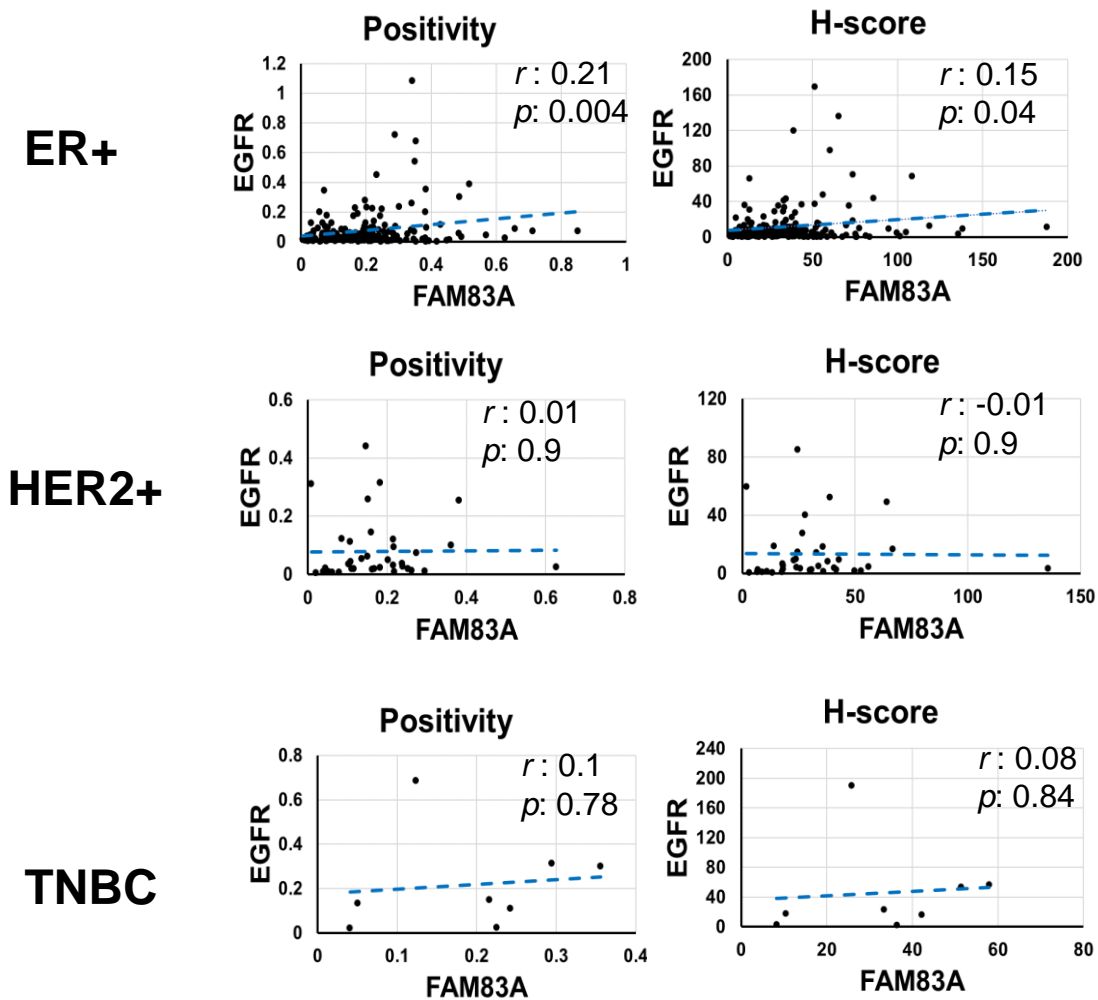

### Supplementary Figure 4: FAM83A-EGFR expression correlation in breast cancer subtypes.

(A) The Single Cell Portal ([https://singlecell.broadinstitute.org/single\\_cell](https://singlecell.broadinstitute.org/single_cell)) was interrogated to evaluate FAM83A and EGFR expression and their direct correlation in epithelial cells from ER+, HER2+, and triple negative breast cancer tissues. (B) Correlation analysis of FAM83A and EGFR immunostaining level by breast cancer subtype. Pearson correlation coefficient ( $r$ ) and  $p$  values ( $p$ ) are shown.
